# Supplementary material for: Transcriptome alterations in peripheral blood B cells of patients with multiple sclerosis receiving immune reconstitution therapy
Source: J Neuroinflammation. 2023 Aug 2;20:181. doi: 10.1186/s12974-023-02859-x (PMC10394872; doi:10.1186/s12974-023-02859-x)
Supplement: Supplementary file 2 — Additional file 2. Information about the 121 blood samples with clinical-demographic data of the patients and assignments to the GEO data set GSE190847. [file 12974_2023_2859_MOESM2_ESM.xlsx]

## Sheet: Additional_File_2
Column in Figure 3	Subject ID	Sex	Age (years)	Diagnosis	Disease duration (years)	EDSS score	Relapses 1	Therapy for MS	Time point	F month 2	Relapse-free 3	Study group	GEO sample ID	GEO sample name 4
1	YL75P	male	36	Healthy	—	—	—	—				healthy	GSM5732852	sample 1, healthy control 1
2	DP31L	female	24	Healthy	—	—	—	—				healthy	GSM5732853	sample 2, healthy control 2
3	GA35J	male	26	Healthy	—	—	—	—				healthy	GSM5732854	sample 3, healthy control 3
4	AM99B	male	22	Healthy	—	—	—	—				healthy	GSM5732855	sample 4, healthy control 4
5	BU46Z	female	21	Healthy	—	—	—	—				healthy	GSM5732856	sample 5, healthy control 5
6	WF19Q	male	25	Healthy	—	—	—	—				healthy	GSM5732857	sample 6, healthy control 6
7	KQ75A	female	20	Healthy	—	—	—	—				healthy	GSM5732858	sample 7, healthy control 7
8	NI16D	female	26	Healthy	—	—	—	—				healthy	GSM5732859	sample 8, healthy control 8
9	RG40U	female	21	Healthy	—	—	—	—				healthy	GSM5732860	sample 9, healthy control 9
10	SW09U	male	20	Healthy	—	—	—	—				healthy	GSM5732861	sample 10, healthy control 10
11	AS50V	female	29	Healthy	—	—	—	—				healthy	GSM5732862	sample 11, healthy control 11
12	UV92Y	male	24	Healthy	—	—	—	—				healthy	GSM5732863	sample 12, healthy control 12
13	UR24X	male	19	Healthy	—	—	—	—				healthy	GSM5732864	sample 13, healthy control 13
14	JZ10E	female	21	Healthy	—	—	—	—				healthy	GSM5732865	sample 14, healthy control 14
15	VP79L	male	22	Healthy	—	—	—	—				healthy	GSM5732866	sample 15, healthy control 15
16	NK32O	female	25	Healthy	—	—	—	—				healthy	GSM5732867	sample 16, healthy control 16
17	JJ39N	male	25	Healthy	—	—	—	—				healthy	GSM5732868	sample 17, healthy control 17
18	GG95O	female	58	Healthy	—	—	—	—				healthy	GSM5732869	sample 18, healthy control 18
19	IS37Q	female	28	Healthy	—	—	—	—				healthy	GSM5732870	sample 19, healthy control 19
20	OB93O	female	25	Healthy	—	—	—	—				healthy	GSM5732871	sample 20, healthy control 20
21	UJ12R	female	29	Healthy	—	—	—	—				healthy	GSM5732872	sample 21, healthy control 21
22	EA14A	female	27	Healthy	—	—	—	—				healthy	GSM5732873	sample 22, healthy control 22
23	IK16H	male	29	Healthy	—	—	—	—				healthy	GSM5732874	sample 23, healthy control 23
24	YZ15U	female	24	Healthy	—	—	—	—				healthy	GSM5732875	sample 24, healthy control 24
25	NO02X	female	47	Healthy	—	—	—	—				healthy	GSM5732876	sample 25, healthy control 25
26	EZ65J	female	31	Healthy	—	—	—	—				healthy	GSM5732877	sample 26, healthy control 26
27	EX67G	male	37	Healthy	—	—	—	—				healthy	GSM5732878	sample 27, healthy control 27
28	BJ73G	female	42	Healthy	—	—	—	—				healthy	GSM5732879	sample 28, healthy control 28
29	WS99W	male	52	PPMS	8.6	4.5	0	pulsed corticosteroids				PPMS	GSM5732880	sample 29, PPMS 1
30	LU77A	female	59	PPMS	5.6	5.5	0	pulsed corticosteroids				PPMS	GSM5732881	sample 30, PPMS 2
31	FP57C	male	57	PPMS	18.2	3.5	0	pulsed corticosteroids				PPMS	GSM5732882	sample 31, PPMS 3
32	HS71K	female	76	PPMS	5.2	6	0	pulsed corticosteroids				PPMS	GSM5732883	sample 32, PPMS 4
33	GD25M	male	57	PPMS	5.1	3.5	0	pulsed corticosteroids				PPMS	GSM5732884	sample 33, PPMS 5
34	KB31W	male	57	PPMS	4.7	4	0	pulsed corticosteroids				PPMS	GSM5732885	sample 34, PPMS 6
35	QP37R	female	60	PPMS	11.2	3.5	0	pulsed corticosteroids				PPMS	GSM5732886	sample 35, PPMS 7
36	DA92E	male	66	PPMS	10.8	6	0	pulsed corticosteroids				PPMS	GSM5732887	sample 36, PPMS 8
37	ML28Z	male	48	PPMS	8.6	4	0	pulsed corticosteroids				PPMS	GSM5732888	sample 37, PPMS 9
38	HG62Z	male	40	PPMS	12.2	8.5	0	pulsed corticosteroids				PPMS	GSM5732889	sample 38, PPMS 10
39	YI20P	male	60	PPMS	13.4	7.5	0	pulsed corticosteroids				PPMS	GSM5732890	sample 39, PPMS 11
40	PZ29H	female	56	PPMS	5.9	2.5	0	pulsed corticosteroids				PPMS	GSM5732891	sample 40, PPMS 12
41	YM42B	female	75	PPMS	17.1	4.5	0	pulsed corticosteroids				PPMS	GSM5732892	sample 41, PPMS 13
42	XI72Y	female	27	RRMS	0.2	2.5	2	glatiramer acetate 5	B1		no	before IRT	GSM5732922	sample 71, RRMS - before IRT 1
43	RQ27P	female	22	RRMS	3.2	3.5	3	fingolimod 5	B1		no	before IRT	GSM5732923	sample 72, RRMS - before IRT 2
44	VR41B	female	25	RRMS	0.7	1.5	2	glatiramer acetate 5	B1		yes	before IRT	GSM5732924	sample 73, RRMS - before IRT 3
45	ST06G	male	39	RRMS	1.2	2	1	interferon-beta-1b 5	B1		yes	before IRT	GSM5732925	sample 74, RRMS - before IRT 4
46	WZ60D	female	41	RRMS	4.8	2.5	0	fingolimod 5	B1		no	before IRT	GSM5732926	sample 75, RRMS - before IRT 5
47	NB65X	male	56	RRMS	7.9	1.5	0	fingolimod 5	B1		yes	before IRT	GSM5732927	sample 76, RRMS - before IRT 6
48	GS78F	female	26	RRMS	1.3	1	0	glatiramer acetate 5	B1		yes	before IRT	GSM5732928	sample 77, RRMS - before IRT 7
49	XI72Y	female	28	RRMS	0.8	3.5	1	alemtuzumab	F1	6.7		alemtuzumab	GSM5732937	sample 86, RRMS - alemtuzumab 9
50	RQ27P	female	22	RRMS	3.8	1.5	2	alemtuzumab	F1	6.9		alemtuzumab	GSM5732946	sample 95, RRMS - alemtuzumab 18
51	VR41B	female	26	RRMS	1.2	1.5	1	alemtuzumab	F1	7.2		alemtuzumab	GSM5732949	sample 98, RRMS - alemtuzumab 21
52	ST06G	male	39	RRMS	1.7	2.5	1	alemtuzumab	F1	6.2		alemtuzumab	GSM5732962	sample 111, RRMS - alemtuzumab 34
53	JL40P	male	35	RRMS	3.9	3	0	alemtuzumab	B2		no	alemtuzumab	GSM5732929	sample 78, RRMS - alemtuzumab 1
54	FQ37Q	female	25	RRMS	1.8	1.5	1	alemtuzumab	B2		yes	alemtuzumab	GSM5732933	sample 82, RRMS - alemtuzumab 5
55	SO62F	female	32	RRMS	3.7	3	0	alemtuzumab	B2		yes	alemtuzumab	GSM5732935	sample 84, RRMS - alemtuzumab 7
56	NR56G	female	27	RRMS	3.3	5	0	alemtuzumab	B2		yes	alemtuzumab	GSM5732940	sample 89, RRMS - alemtuzumab 12
57	BX71F	female	27	RRMS	1.3	2	0	alemtuzumab	B2		yes	alemtuzumab	GSM5732942	sample 91, RRMS - alemtuzumab 14
58	MV73T	female	31	RRMS	12.3	3	0	alemtuzumab	B2		yes	alemtuzumab	GSM5732944	sample 93, RRMS - alemtuzumab 16
59	RQ27P	female	23	RRMS	4.2	2	1	alemtuzumab	B2		yes	alemtuzumab	GSM5732947	sample 96, RRMS - alemtuzumab 19
60	VR41B	female	26	RRMS	1.7	1.5	1	alemtuzumab	B2		yes	alemtuzumab	GSM5732950	sample 99, RRMS - alemtuzumab 22
61	NW15M	female	29	RRMS	4.7	1.5	0	alemtuzumab	B2		no	alemtuzumab	GSM5732952	sample 101, RRMS - alemtuzumab 24
62	FO57C	female	21	RRMS	1.1	2	0	alemtuzumab	B2		no	alemtuzumab	GSM5732956	sample 105, RRMS - alemtuzumab 28
63	AG38J	female	33	RRMS	1.4	2	0	alemtuzumab	B2		no	alemtuzumab	GSM5732958	sample 107, RRMS - alemtuzumab 30
64	FX35A	female	31	RRMS	13.2	3	0	alemtuzumab	B2		yes	alemtuzumab	GSM5732963	sample 112, RRMS - alemtuzumab 35
65	HY04Q	male	23	RRMS	1.1	1.5	0	alemtuzumab	B2		yes	alemtuzumab	GSM5732965	sample 114, RRMS - alemtuzumab 37
66	JL40P	male	35	RRMS	4.5	3.5	0	alemtuzumab	F2	6.7		alemtuzumab	GSM5732930	sample 79, RRMS - alemtuzumab 2
67	FQ37Q	female	25	RRMS	2.5	—	0	alemtuzumab	F2	9.2		alemtuzumab	GSM5732934	sample 83, RRMS - alemtuzumab 6
68	SO62F	female	33	RRMS	4.3	2	0	alemtuzumab	F2	7.8		alemtuzumab	GSM5732936	sample 85, RRMS - alemtuzumab 8
69	NR56G	female	28	RRMS	3.7	4.5	0	alemtuzumab	F2	4.6		alemtuzumab	GSM5732941	sample 90, RRMS - alemtuzumab 13
70	BX71F	female	28	RRMS	1.8	2	0	alemtuzumab	F2	4.8		alemtuzumab	GSM5732943	sample 92, RRMS - alemtuzumab 15
71	MV73T	female	32	RRMS	12.9	3	0	alemtuzumab	F2	6.7		alemtuzumab	GSM5732945	sample 94, RRMS - alemtuzumab 17
72	RQ27P	female	23	RRMS	4.8	1.5	0	alemtuzumab	F2	8		alemtuzumab	GSM5732948	sample 97, RRMS - alemtuzumab 20
73	VR41B	female	27	RRMS	2.2	1.5	0	alemtuzumab	F2	7.4		alemtuzumab	GSM5732951	sample 100, RRMS - alemtuzumab 23
74	NW15M	female	29	RRMS	5.2	2	2	alemtuzumab	F2	6.9		alemtuzumab	GSM5732953	sample 102, RRMS - alemtuzumab 25
75	FO57C	female	21	RRMS	1.8	4.5	0	alemtuzumab	F2	7.3		alemtuzumab	GSM5732957	sample 106, RRMS - alemtuzumab 29
76	AG38J	female	33	RRMS	2	2	0	alemtuzumab	F2	7.6		alemtuzumab	GSM5732959	sample 108, RRMS - alemtuzumab 31
77	FX35A	female	31	RRMS	13.7	3	0	alemtuzumab	F2	6.2		alemtuzumab	GSM5732964	sample 113, RRMS - alemtuzumab 36
78	HY04Q	male	23	RRMS	1.8	1.5	0	alemtuzumab	F2	8.2		alemtuzumab	GSM5732966	sample 115, RRMS - alemtuzumab 38
79	JL40P	male	36	RRMS	5	5	1	alemtuzumab	B3		no	alemtuzumab	GSM5732931	sample 80, RRMS - alemtuzumab 3
80	XI72Y	female	29	RRMS	2.3	2.5	2	alemtuzumab	B3		no	alemtuzumab	GSM5732938	sample 87, RRMS - alemtuzumab 10
81	AG38J	female	34	RRMS	2.8	1.5	1	alemtuzumab	B3		no	alemtuzumab	GSM5732960	sample 109, RRMS - alemtuzumab 32
82	JL40P	male	37	RRMS	5.6	3	1	alemtuzumab	F3	7.8		alemtuzumab	GSM5732932	sample 81, RRMS - alemtuzumab 4
83	XI72Y	female	30	RRMS	2.8	2.5	0	alemtuzumab	F3	6		alemtuzumab	GSM5732939	sample 88, RRMS - alemtuzumab 11
84	AG38J	female	35	RRMS	3.2	1.5	0	alemtuzumab	F3	6.1		alemtuzumab	GSM5732961	sample 110, RRMS - alemtuzumab 33
85	NW15M	female	31	RRMS	6.8	3	2	alemtuzumab	B4		yes	alemtuzumab	GSM5732954	sample 103, RRMS - alemtuzumab 26
86	NW15M	female	31	RRMS	7.2	1.5	2	alemtuzumab	F4	6.4		alemtuzumab	GSM5732955	sample 104, RRMS - alemtuzumab 27
87	TB28Y	female	56	RRMS	25.8	—	0	cladribine	F1	10.8		cladribine	GSM5732969	sample 118, RRMS - cladribine 3
88	GS78F	female	26	RRMS	1.8	2	0	cladribine	F1	6.2		cladribine	GSM5732970	sample 119, RRMS - cladribine 4
89	MQ31Q	female	39	RRMS	9.4	3.5	1	cladribine	F1	4.9		cladribine	GSM5732971	sample 120, RRMS - cladribine 5
90	VB12X	female	32	RRMS	1.1	2.5	2	cladribine	F1	5.7		cladribine	GSM5732972	sample 121, RRMS - cladribine 6
91	NB65X	male	57	RRMS	9	1.5	0	cladribine	B2		yes	cladribine	GSM5732968	sample 117, RRMS - cladribine 2
92	WZ60D	female	42	RRMS	6.4	3	0	cladribine	F2	6.7		cladribine	GSM5732967	sample 116, RRMS - cladribine 1
93	JP17K	female	27	RRMS	1.5	2	0	natalizumab				natalizumab	GSM5732893	sample 42, RRMS - natalizumab 1
94	YU84R	male	40	RRMS	11.1	—	0	natalizumab				natalizumab	GSM5732894	sample 43, RRMS - natalizumab 2
95	LL05I	male	40	RRMS	16.3	5	0	natalizumab				natalizumab	GSM5732895	sample 44, RRMS - natalizumab 3
96	OG41T	female	28	RRMS	6.3	1.5	0	natalizumab				natalizumab	GSM5732896	sample 45, RRMS - natalizumab 4
97	AX91B	male	35	RRMS	14	1	0	natalizumab				natalizumab	GSM5732897	sample 46, RRMS - natalizumab 5
98	TU31E	female	33	RRMS	6.5	—	0	natalizumab				natalizumab	GSM5732898	sample 47, RRMS - natalizumab 6
99	CV72K	male	39	RRMS	8.3	1.5	0	natalizumab				natalizumab	GSM5732899	sample 48, RRMS - natalizumab 7
100	FH36B	female	45	RRMS	14.3	3	0	natalizumab				natalizumab	GSM5732900	sample 49, RRMS - natalizumab 8
101	JA49T	female	43	RRMS	19.3	3.5	0	natalizumab				natalizumab	GSM5732901	sample 50, RRMS - natalizumab 9
102	JS41C	female	36	RRMS	15.2	3	0	natalizumab				natalizumab	GSM5732902	sample 51, RRMS - natalizumab 10
103	FZ29O	male	42	RRMS	6.4	3.5	0	natalizumab				natalizumab	GSM5732903	sample 52, RRMS - natalizumab 11
104	OC85F	female	43	RRMS	16.4	3.5	0	natalizumab				natalizumab	GSM5732904	sample 53, RRMS - natalizumab 12
105	TK64I	female	40	RRMS	17.1	7.5	0	natalizumab				natalizumab	GSM5732905	sample 54, RRMS - natalizumab 13
106	TA01O	male	34	RRMS	6.2	2	0	natalizumab				natalizumab	GSM5732906	sample 55, RRMS - natalizumab 14
107	ZN53W	female	43	RRMS	5.2	2	0	natalizumab				natalizumab	GSM5732907	sample 56, RRMS - natalizumab 15
108	LV84E	female	51	RRMS	18.3	—	0	natalizumab				natalizumab	GSM5732908	sample 57, RRMS - natalizumab 16
109	YF57N	male	49	RRMS	17.8	1.5	0	natalizumab				natalizumab	GSM5732909	sample 58, RRMS - natalizumab 17
110	WT88E	female	51	RRMS	6.4	—	0	natalizumab				natalizumab	GSM5732910	sample 59, RRMS - natalizumab 18
111	FI53K	male	56	RRMS	11.5	—	0	natalizumab				natalizumab	GSM5732911	sample 60, RRMS - natalizumab 19
112	YE86K	female	40	RRMS	12.6	—	0	natalizumab				natalizumab	GSM5732912	sample 61, RRMS - natalizumab 20
113	HN50Q	female	62	RRMS	23.1	—	0	natalizumab				natalizumab	GSM5732913	sample 62, RRMS - natalizumab 21
114	LQ80A	male	45	RRMS	21.2	4.5	0	natalizumab				natalizumab	GSM5732914	sample 63, RRMS - natalizumab 22
115	YC30Z	male	47	RRMS	12.9	2	0	natalizumab				natalizumab	GSM5732915	sample 64, RRMS - natalizumab 23
116	WV93M	female	56	RRMS	17.9	—	0	natalizumab				natalizumab	GSM5732916	sample 65, RRMS - natalizumab 24
117	XC02A	male	49	RRMS	13.7	3.5	0	natalizumab				natalizumab	GSM5732917	sample 66, RRMS - natalizumab 25
118	FG72S	female	56	RRMS	19.1	4	0	natalizumab				natalizumab	GSM5732918	sample 67, RRMS - natalizumab 26
119	ZN78Z	female	54	RRMS	25.2	6.5	0	natalizumab				natalizumab	GSM5732919	sample 68, RRMS - natalizumab 27
120	GC36W	male	45	RRMS	20.2	2	0	natalizumab				natalizumab	GSM5732920	sample 69, RRMS - natalizumab 28
121	SS90D	male	60	RRMS	21.3	4	0	natalizumab				natalizumab	GSM5732921	sample 70, RRMS - natalizumab 29
Information about the 121 blood samples with clinical-demographic data of the patients and assignments to the GEO dataset GSE190847
Footnotes:
1 Number of relapses in the 12 months before the blood sample was taken
2 Number of months since the previous treatment course was started
3 It is reported whether or not the patient was free of relapses in the 12 months after the start of the treatment course
4 Sample 89 was not included in our study on microRNAs (Hecker et al., EBioMedicine, 2022) due to insufficient amount of RNA available
5 This therapy was stopped up to 2 months before switching to IRT with alemtuzumab or cladribine
Abbreviations:
— = not available
B = before annual treatment course
EDSS = Expanded Disability Status Scale
F = following annual treatment course
GEO = Gene Expression Omnibus
ID = identifier
IRT = immune reconstitution therapy
MS = multiple sclerosis
PPMS = primary progressive multiple sclerosis
RRMS = relapsing-remitting multiple sclerosis

## Sheet: Summary
Group	Samples, n	Subjects, n	Women, n (%)	Men, n (%)	Age (years), mean ± SD 1	Disease duration (years), mean ± SD 1	EDSS score, mean ± SD 1	Relapses, mean ± SD 1,2
By diagnosis
healthy controls	28	28	17 (60.7)	11 (39.3)	28.0 ± 8.9	—	—	—
MS patients	93	63	38 (60.3)	25 (39.7)	39.2 ± 13.1	8.2 ± 6.6	3.0 ± 1.6	0.3 ± 0.7
By disease course
PPMS	13	13	5 (38.5)	8 (61.5)	58.7 ± 9.8	9.7 ± 4.6	4.9 ± 1.7	0.0 ± 0.0
RRMS	80	50	33 (66.0)	17 (34.0)	36.1 ± 10.6	8.0 ± 6.9	2.7 ± 1.3	0.4 ± 0.7
By RRMS treatment status
before IRT	7	7	5 (71.4)	2 (28.6)	33.7 ± 12.2	2.8 ± 2.8	2.1 ± 0.8	1.1 ± 1.2
alemtuzumab	38	15	12 (80.0)	3 (20.0)	29.2 ± 4.7	4.2 ± 3.5	2.5 ± 1.0	0.5 ± 0.7
cladribine	6	6	5 (83.3)	1 (16.7)	42.0 ± 12.5	8.9 ± 9.0	2.5 ± 0.8	0.5 ± 0.8
natalizumab	29	29	16 (55.2)	13 (44.8)	44.4 ± 9.0	14.0 ± 6.1	3.2 ± 1.7	0.0 ± 0.0
By relapse after alemtuzumab 3
yes	9	6	5 (83.3)	1 (16.7)	29.6 ± 5.5	2.7 ± 1.6	2.6 ± 1.1	1.0 ± 1.1
no	12	11	9 (81.8)	2 (18.2)	28.3 ± 4.6	4.3 ± 4.3	2.4 ± 1.0	0.7 ± 0.8
Summary statistics by group
Footnotes:
1 Means and standard deviations are reported for the time point of blood collection over all samples while excluding missing values
2 Based on the number of relapses in the 12 months before the blood sample was taken
3 Grouped by whether or not the patient had a relapse in the 12 months after an alemtuzumab treatment course
Abbreviations:
— = not available
EDSS = Expanded Disability Status Scale
IRT = immune reconstitution therapy
MS = multiple sclerosis
PPMS = primary progressive multiple sclerosis
RRMS = relapsing-remitting multiple sclerosis
SD = standard deviation
