# Supplementary material for: Transcriptome alterations in peripheral blood B cells of patients with multiple sclerosis receiving immune reconstitution therapy
Source: J Neuroinflammation. 2023 Aug 2;20:181. doi: 10.1186/s12974-023-02859-x (PMC10394872; doi:10.1186/s12974-023-02859-x)
Supplement: Supplementary file 5 — Additional file 5. Enrichment of Gene Ontology terms for each gene cluster. [file 12974_2023_2859_MOESM5_ESM.xlsx]

## Sheet: Additional_File_5
Cluster	GO ID 1	GO term	Size 2	Expected count	Count	Odds ratio	p-value 3	Genes
1	GO:0006396	RNA processing	908	7.95728	74	22.4189	6.44721e-56	BCAS2, FAM103A1, FBL, RMRP, RNU11, RNU4-2, RNU4ATAC, RNU6-1|RNU6-2|RNU6-7|RNU6-8|RNU6-9|RNU6-3P|RNU6-11P, RNU6ATAC, RNVU1-17, RNVU1-6, RNVU1-7, RPL14, RPL27, RPL35A, RPPH1, RPS14, RPS19, RPS6, SCARNA1, SCARNA10, SCARNA11, SCARNA2, SCARNA23, SCARNA5, SCARNA6, SCARNA7, SCARNA8, SCARNA9, SCARNA9L, SNORA15, SNORA22, SNORA26, SNORA37, SNORA54, SNORA5A, SNORA65, SNORA71B, SNORA71D, SNORA72, SNORA75, SN…
1	GO:0016070	RNA metabolic process	3889	34.0813	102	11.0752	3.73567e-36	ARL2BP, ASF1A, BCAS2, C19orf43, CNBP, COMMD6, DDX24, ELK4, FAM103A1, FBL, HIST1H4C, HIST1H4E, PFDN5, PRKRIR, RMRP, RNF41, RNU11, RNU4-2, RNU4ATAC, RNU6-1|RNU6-2|RNU6-7|RNU6-8|RNU6-9|RNU6-3P|RNU6-11P, RNU6ATAC, RNVU1-17, RNVU1-6, RNVU1-7, RPL14, RPL15, RPL19, RPL27, RPL31, RPL35A, RPL37A, RPL41|RPL41P5|RPL41P2|RPL41P1, RPLP1, RPPH1, RPS10, RPS12, RPS14, RPS18, RPS19, RPS21, RPS25, RPS29|RPL32P29, …
1	GO:0090304	nucleic acid metabolic process	4357	38.1827	102	9.42553	1.48426e-31	ARL2BP, ASF1A, BCAS2, C19orf43, CNBP, COMMD6, DDX24, ELK4, FAM103A1, FBL, HIST1H4C, HIST1H4E, PFDN5, PRKRIR, RMRP, RNF41, RNU11, RNU4-2, RNU4ATAC, RNU6-1|RNU6-2|RNU6-7|RNU6-8|RNU6-9|RNU6-3P|RNU6-11P, RNU6ATAC, RNVU1-17, RNVU1-6, RNVU1-7, RPL14, RPL15, RPL19, RPL27, RPL31, RPL35A, RPL37A, RPL41|RPL41P5|RPL41P2|RPL41P1, RPLP1, RPPH1, RPS10, RPS12, RPS14, RPS18, RPS19, RPS21, RPS25, RPS29|RPL32P29, …
1	GO:0006139	nucleobase-containing compound metabolic process	4899	42.9325	102	7.9173	6.58258e-27	ARL2BP, ASF1A, BCAS2, C19orf43, CNBP, COMMD6, DDX24, ELK4, FAM103A1, FBL, HIST1H4C, HIST1H4E, PFDN5, PRKRIR, RMRP, RNF41, RNU11, RNU4-2, RNU4ATAC, RNU6-1|RNU6-2|RNU6-7|RNU6-8|RNU6-9|RNU6-3P|RNU6-11P, RNU6ATAC, RNVU1-17, RNVU1-6, RNVU1-7, RPL14, RPL15, RPL19, RPL27, RPL31, RPL35A, RPL37A, RPL41|RPL41P5|RPL41P2|RPL41P1, RPLP1, RPPH1, RPS10, RPS12, RPS14, RPS18, RPS19, RPS21, RPS25, RPS29|RPL32P29, …
1	GO:0010467	gene expression	4846	42.468	101	7.67305	1.92438e-26	ASF1A, BCAS2, C12orf65, CNBP, COMMD6, EIF3D, ELK4, FAM103A1, FBL, HIST1H4C, HIST1H4E, PFDN5, PRKRIR, RMRP, RNF41, RNU11, RNU4-2, RNU4ATAC, RNU6-1|RNU6-2|RNU6-7|RNU6-8|RNU6-9|RNU6-3P|RNU6-11P, RNU6ATAC, RNVU1-17, RNVU1-6, RNVU1-7, RPL14, RPL15, RPL19, RPL27, RPL31, RPL35A, RPL37A, RPL41|RPL41P5|RPL41P2|RPL41P1, RPLP1, RPPH1, RPS10, RPS12, RPS14, RPS18, RPS19, RPS21, RPS25, RPS29|RPL32P29, RPS5, RP…
7	GO:0022402	cell cycle process	1142	1.72012	8	6.77753	0.00016133	EZH2, MDM4, MKI67, NCAPG, PLK1, RRM2, SMC4, TOP2A
2	GO:0006810	transport	4122	28.7857	44	1.93952	0.000861261	ACKR3, ADD2, ADRB2, ANKH, ANKRD13A, AP3S1, APOC1, ARF6, ARHGAP25, ARL4D, ARL6IP5, CA1, CALHM2, CALM2, CD24, CD274, CDC42SE2, CLECL1, CREBL2, CYB5R2, DOCK7, ECI2, F8, FCHO2, HABP4, HBD, IL10RA, KCNH2, NEDD4L, PCYOX1, PDCD6IP, PEA15, RASGRF1, RILPL2, RIPK2, RNF5, SELM, SERPINB6, SLC16A4, SNTA1, SPTA1, TERF2, UHMK1, ZFAND6
7	GO:0007049	cell cycle	1531	2.30604	8	4.90048	0.00118794	EZH2, MDM4, MKI67, NCAPG, PLK1, RRM2, SMC4, TOP2A
2	GO:0051234	establishment of localization	4230	29.5399	44	1.86991	0.00153123	ACKR3, ADD2, ADRB2, ANKH, ANKRD13A, AP3S1, APOC1, ARF6, ARHGAP25, ARL4D, ARL6IP5, CA1, CALHM2, CALM2, CD24, CD274, CDC42SE2, CLECL1, CREBL2, CYB5R2, DOCK7, ECI2, F8, FCHO2, HABP4, HBD, IL10RA, KCNH2, NEDD4L, PCYOX1, PDCD6IP, PEA15, RASGRF1, RILPL2, RIPK2, RNF5, SELM, SERPINB6, SLC16A4, SNTA1, SPTA1, TERF2, UHMK1, ZFAND6
4	GO:0007165	signal transduction	4705	19.0055	30	2.18447	0.00223003	AIM2, ANK3, ARHGAP31, ATRNL1, BMPR1A, CD27, CD80, COL4A3, CRIP1, ERRFI1, FCGR2B, GCLC, GLRX2, IL2RA, KCNN4, MDFIC, MLLT4, NEK6, NEO1, PLEKHG7, RASSF6, RGS7, RIC8B, RPS6KA6, SCIMP, SGPP1, TCF7, TLE3, TNFRSF13B, WDR11
2	GO:0048519	negative regulation of biological process	4605	32.1587	46	1.79186	0.00269997	ABHD6, ACKR3, ADD2, ADRB2, AKT3, ANKRD13A, ANXA7, APOC1, ARF6, ARHGAP25, ARL6IP5, BACE2, BCL2A1, BHLHE40, BMPR2, C16orf45, CALM2, CAST, CD24, CD274, CEBPG, DOCK7, ETV6, FAM60A, IL10RA, KCNH2, LILRA4, MID2, NCOA7, NEDD4L, NR1D2, PARP3, PEA15, PER3, PHF6, RIPK2, RNF5, SERPINB6, SNTA1, SPTA1, TCEAL1, TEAD2, TERF2, UHMK1, WNT16, ZFAND6
3	GO:0042981	regulation of apoptotic process	1275	3.6663	10	3.28533	0.0027336	APH1A, BCL2, CDK4, CNR1, CTSH, HIGD2A, IGF1R, NFKBIA, NSMAF, PHB
3	GO:0043067	regulation of programmed cell death	1300	3.73819	10	3.2156	0.00315149	APH1A, BCL2, CDK4, CNR1, CTSH, HIGD2A, IGF1R, NFKBIA, NSMAF, PHB
2	GO:0048523	negative regulation of cellular process	3869	27.0189	40	1.79867	0.00330246	ABHD6, ACKR3, ADD2, ADRB2, AKT3, ANKRD13A, APOC1, ARF6, ARHGAP25, BACE2, BCL2A1, BHLHE40, BMPR2, C16orf45, CALM2, CAST, CD274, ETV6, FAM60A, IL10RA, KCNH2, LILRA4, NCOA7, NEDD4L, NR1D2, PARP3, PEA15, PER3, PHF6, RIPK2, RNF5, SERPINB6, SNTA1, SPTA1, TCEAL1, TEAD2, TERF2, UHMK1, WNT16, ZFAND6
6	GO:0007155	cell adhesion	1114	0.38135	3	18.2133	0.00393598	PCDH9, PDLIM1, PTPRK
6	GO:0022610	biological adhesion	1120	0.383404	3	18.1074	0.00399738	PCDH9, PDLIM1, PTPRK
3	GO:0065009	regulation of molecular function	2600	7.47638	15	2.57447	0.00429686	AKAP6, APH1A, ARHGAP20, ARL2, BCL2, CAMK2N1, CDK4, CNR1, CTSH, ESR2, IGF1R, ISCU, NETO1, NFKBIA, NSMAF
3	GO:0042127	regulation of cell proliferation	1368	3.93373	10	3.03894	0.0045546	BCL2, CAMK2N1, CDK4, CTSH, HLA-DPA1, IGF1R, NFKBIA, NRP2, PHB, TSPAN31
3	GO:0006915	apoptotic process	1627	4.67849	11	2.8431	0.00515794	APH1A, BCL2, CDK4, CNR1, CTSH, HIGD2A, IGF1R, NFKBIA, NSMAF, PHB, SLC25A6
3	GO:0010941	regulation of cell death	1405	4.04012	10	2.95004	0.00550555	APH1A, BCL2, CDK4, CNR1, CTSH, HIGD2A, IGF1R, NFKBIA, NSMAF, PHB
4	GO:0008219	cell death	1857	7.50123	15	2.35138	0.00587617	AIM2, CD27, COL4A3, CRIP1, FAIM, FCGR2B, GCLC, GLRX2, IL2RA, KDM2B, NEK6, RASSF6, SGPP1, ST14, STPG1
6	GO:0006979	response to oxidative stress	379	0.129741	2	25.153	0.00637572	PDLIM1, PTPRK
2	GO:0032879	regulation of localization	2284	15.9502	26	1.85537	0.00671015	ABHD6, ACKR3, ADRB2, AKT3, ANKRD13A, APOC1, ARF6, ARL6IP5, BMPR2, C16orf45, CALM2, CD274, CREBL2, DOCK7, FAM60A, GPR183, JAM3, KCNH2, NEDD4L, PDCD6IP, PEA15, RASGRF1, RIPK2, RSL1D1, SNTA1, UHMK1
2	GO:0065008	regulation of biological quality	3139	21.921	33	1.75506	0.00697305	ABHD6, ADD2, ADRB2, AKT3, ANXA7, ARF6, ARL6IP5, BACE2, BMPR2, CALM2, CD24, CDC42SE2, CEBPG, CREBL2, DOCK7, F8, GATM, GPR183, HBD, IL10RA, JAM3, KCNH2, NEDD4L, NR1D2, PARP3, PDCD6IP, PER3, RASGRF1, RNF5, SELM, SNTA1, SPTA1, TERF2
8	GO:0002376	immune system process	2543	7.83479	15	2.37994	0.00720219	ADARB1, ATP11A, ATP8A1, CAMK2D, CD1A, CLEC2D, CR2, DTX1, GRAP2, IL21R, PHLPP1, PSME4, RB1, RC3H1, RFTN1
3	GO:0010646	regulation of cell communication	3044	8.75312	16	2.34448	0.00775896	AKAP6, ARHGAP20, ARL2, BCL2, CAMK2N1, CDK4, CNR1, CTSH, ESR2, IGF1R, NETO1, NFKBIA, PHB, SLC25A6, SLC9B2, STARD10
4	GO:0012501	programmed cell death	1742	7.0367	14	2.30795	0.00830422	AIM2, CD27, COL4A3, CRIP1, FAIM, GCLC, GLRX2, IL2RA, KDM2B, NEK6, RASSF6, SGPP1, ST14, STPG1
3	GO:0012501	programmed cell death	1742	5.00917	11	2.63064	0.00860425	APH1A, BCL2, CDK4, CNR1, CTSH, HIGD2A, IGF1R, NFKBIA, NSMAF, PHB, SLC25A6
3	GO:0048518	positive regulation of biological process	4888	14.0556	22	2.19231	0.00871177	AKAP6, APH1A, ARL2, BCL2, CAMK2N1, CDK4, CNR1, CTSH, ESR2, HLA-DPA1, IGF1R, ISCU, NETO1, NFKBIA, NRP2, NSMAF, PHB, SLC25A6, SLC9B2, STARD10, TSPAN31, ZFP36L2
3	GO:0023051	regulation of signaling	3084	8.86814	16	2.30589	0.00882561	AKAP6, ARHGAP20, ARL2, BCL2, CAMK2N1, CDK4, CNR1, CTSH, ESR2, IGF1R, NETO1, NFKBIA, PHB, SLC25A6, SLC9B2, STARD10
4	GO:0007166	cell surface receptor signaling pathway	2348	9.4846	17	2.12122	0.00967816	AIM2, BMPR1A, CD27, CD80, COL4A3, ERRFI1, FCGR2B, GCLC, IL2RA, KCNN4, MDFIC, NEO1, SGPP1, TCF7, TLE3, TNFRSF13B, WDR11
3	GO:0048522	positive regulation of cellular process	4306	12.382	20	2.18004	0.00982264	AKAP6, APH1A, ARL2, BCL2, CDK4, CNR1, CTSH, ESR2, HLA-DPA1, IGF1R, ISCU, NETO1, NFKBIA, NRP2, NSMAF, PHB, SLC9B2, STARD10, TSPAN31, ZFP36L2
4	GO:0050793	regulation of developmental process	2162	8.73326	16	2.1502	0.0100675	ABCA5, BHLHE41, BMPR1A, CD27, CD80, COCH, COL4A3, ERRFI1, FCGR2B, IL2RA, KDM2B, LRRN1, NEK6, PLAG1, RPS6KA6, SGPP1
2	GO:0048583	regulation of response to stimulus	3600	25.1404	36	1.67432	0.0102975	AAED1, ABHD6, ACKR3, ADRB2, AKT3, ARF6, ARHGAP24, ARHGAP25, ARL6IP5, BMPR2, CALM2, CD24, CD274, CDC42SE2, CEBPG, CNPY3, DEK, GPR183, IER5, IL10RA, IL18BP, JAM3, LILRA4, MID2, NCOA7, NR1D2, NR3C2, PARP3, PEA15, RASGRF1, RIPK2, RSL1D1, SYDE2, TERF2, WNT16, ZFAND6
3	GO:0050790	regulation of catalytic activity	1814	5.21621	11	2.51142	0.0115549	APH1A, ARHGAP20, ARL2, BCL2, CAMK2N1, CDK4, CNR1, CTSH, IGF1R, ISCU, NSMAF
3	GO:0008219	cell death	1857	5.33986	11	2.44466	0.0136619	APH1A, BCL2, CDK4, CNR1, CTSH, HIGD2A, IGF1R, NFKBIA, NSMAF, PHB, SLC25A6
3	GO:0008283	cell proliferation	1628	4.68136	10	2.50039	0.015036	BCL2, CAMK2N1, CDK4, CTSH, HLA-DPA1, IGF1R, NFKBIA, NRP2, PHB, TSPAN31
2	GO:0048518	positive regulation of biological process	4888	34.135	45	1.57487	0.0158524	AAED1, ABHD6, ACKR3, ADRB2, AKT3, APOC1, ARF6, ARL6IP5, BMPR2, CALHM2, CALM2, CD24, CD274, CDC42SE2, CEBPG, CLECL1, CNPY3, CREBL2, DEK, DOCK7, ETV6, FAM60A, GATM, GPR183, HABP4, IER5, IL10RA, KCNH2, KLF6, LILRA4, MID2, NCOA7, NEDD4L, NR1D2, NR3C2, PARP3, PDCD6IP, PEA15, RASGRF1, RIPK2, SPTA1, TEAD2, TERF2, UHMK1, WNT16
8	GO:0048583	regulation of response to stimulus	3600	11.0913	18	2.04336	0.0163895	ARHGAP32, CAMK2D, CD1A, CLEC2D, CORO2B, CR2, CTNND1, DNMBP, DTX1, GAB1, GRAP2, IGFBP4, PHLPP1, PSME4, RB1, RC3H1, RFTN1, SH3BP2
8	GO:0035556	intracellular signal transduction	2266	6.98138	13	2.21932	0.0164247	ARHGAP32, CAMK2D, DNMBP, GAB1, GRAP2, IGFBP4, PDK1, PHLPP1, PIK3C2B, PSME4, RAPGEF5, RB1, RC3H1
4	GO:0009653	anatomical structure morphogenesis	2084	8.41818	15	2.056	0.0164547	ANK3, BHLHE41, BMPR1A, COCH, COL4A3, CRIP1, ERRFI1, KDM2B, NEO1, PLAG1, POF1B, ST14, TCF7, TLE3, WEE1
2	GO:0009893	positive regulation of metabolic process	2824	19.7212	29	1.66423	0.0166306	AAED1, ABHD6, ACKR3, ADRB2, APOC1, ARL6IP5, BMPR2, CALM2, CD24, CEBPG, CREBL2, DEK, DOCK7, ETV6, GATM, GPR183, HABP4, IER5, KLF6, MID2, NCOA7, NR1D2, PARP3, PEA15, RIPK2, TEAD2, TERF2, UHMK1, WNT16
6	GO:0098609	cell-cell adhesion	647	0.221484	2	14.4248	0.017919	PCDH9, PDLIM1
3	GO:0071310	cellular response to organic substance	2196	6.31467	12	2.2674	0.0179511	AKAP6, BCL2, CDK4, CTSH, ESR2, HLA-DPA1, IGF1R, NFKBIA, NRP2, PHB, SLC9B2, ZFP36L2
4	GO:0048583	regulation of response to stimulus	3600	14.542	22	1.82284	0.0207653	AIM2, ARHGAP31, BMPR1A, CD27, CD80, COCH, ERRFI1, FCGR2B, GCLC, GLRX2, IL2RA, KCNN4, MDFIC, NEK6, NEO1, PLEKHG7, RGS7, RIC8B, RPS6KA6, SAMSN1, SCIMP, WDR11
4	GO:0009966	regulation of signal transduction	2762	11.1569	18	1.88841	0.0216008	ARHGAP31, BMPR1A, CD27, CD80, ERRFI1, FCGR2B, GCLC, GLRX2, KCNN4, MDFIC, NEK6, NEO1, PLEKHG7, RGS7, RIC8B, RPS6KA6, SCIMP, WDR11
8	GO:0007166	cell surface receptor signaling pathway	2348	7.23401	13	2.12711	0.0216478	CAMK2D, CLEC2D, CR2, CTNND1, DTX1, GAB1, GRAP2, IGFBP4, IL21R, PSME4, RB1, RC3H1, RFTN1
3	GO:0032879	regulation of localization	2284	6.56771	12	2.16408	0.0239109	AKAP6, ARL2, BCL2, CNR1, CTSH, IGF1R, ISCU, NETO1, NFKBIA, NRP2, SLC25A6, SLC9B2
4	GO:0048523	negative regulation of cellular process	3869	15.6286	23	1.77763	0.0241335	ABCA5, ANK3, ATP1A1, BHLHE41, BMPR1A, CD27, COL4A3, ERRFI1, FAIM, FCGR2B, GCLC, IL2RA, KDM2B, MCOLN2, MDFIC, MLLT4, RGS7, RPS6KA6, SAMSN1, TCF7, TFEC, TLE3, WEE1
4	GO:0048731	system development	3873	15.6447	23	1.77512	0.0244179	ANK3, BHLHE41, BMPR1A, C11orf63, CD27, CD80, COL4A3, COL4A4, CRIP1, ERRFI1, FCGR2B, IL2RA, KDM2B, LRRN1, NEO1, PLAG1, RPS6KA6, SGPP1, ST14, TCF7, TLE3, WDR11, WEE1
5	GO:0032879	regulation of localization	2284	0.312748	2	Inf	0.0244438	AZIN2, PTPRM
3	GO:0007165	signal transduction	4705	13.5294	20	1.91695	0.0266314	AKAP6, APH1A, ARHGAP20, BCL2, CAMK2N1, CDK4, CNR1, CTSH, ESR2, GPR132, HLA-DPA1, IGF1R, NETO1, NFKBIA, NRP2, NSMAF, PHB, RHPN2, STARD10, ZFP36L2
4	GO:0010646	regulation of cell communication	3044	12.296	19	1.80924	0.027387	ANK3, ARHGAP31, BMPR1A, CD27, CD80, ERRFI1, FCGR2B, GCLC, GLRX2, KCNN4, MDFIC, NEK6, NEO1, PLEKHG7, RGS7, RIC8B, RPS6KA6, SCIMP, WDR11
4	GO:0048513	animal organ development	2843	11.4841	18	1.82168	0.0283064	BHLHE41, BMPR1A, C11orf63, CD27, CD80, COL4A3, COL4A4, CRIP1, ERRFI1, FCGR2B, IL2RA, KDM2B, PLAG1, SGPP1, ST14, TCF7, TLE3, WDR11
8	GO:0007165	signal transduction	4705	14.4958	21	1.84508	0.0300145	ARHGAP32, CAMK2D, CLEC2D, CR2, CTNND1, DNMBP, DTX1, GAB1, GRAP2, IGFBP4, IL21R, PDK1, PHLPP1, PIK3C2B, PSME4, RAPGEF5, RB1, RC3H1, RFTN1, SH3BP2, TAPT1
3	GO:0070887	cellular response to chemical stimulus	2646	7.60865	13	2.03129	0.0305634	AKAP6, BCL2, CDK4, CTSH, ESR2, HLA-DPA1, IGF1R, NFKBIA, NRP2, PHB, RBM11, SLC9B2, ZFP36L2
4	GO:0023051	regulation of signaling	3084	12.4576	19	1.77943	0.031027	ARHGAP31, ATP1A1, BMPR1A, CD27, CD80, ERRFI1, FCGR2B, GCLC, GLRX2, KCNN4, MDFIC, NEK6, NEO1, PLEKHG7, RGS7, RIC8B, RPS6KA6, SCIMP, WDR11
3	GO:0010033	response to organic substance	2684	7.71792	13	1.99601	0.0339631	AKAP6, BCL2, CDK4, CNR1, CTSH, ESR2, HLA-DPA1, IGF1R, NFKBIA, NRP2, PHB, SLC9B2, ZFP36L2
2	GO:0048522	positive regulation of cellular process	4306	30.0707	39	1.48516	0.0353244	AAED1, ACKR3, ADRB2, AKT3, APOC1, ARF6, ARL6IP5, BMPR2, CALHM2, CALM2, CD24, CD274, CDC42SE2, CEBPG, CLECL1, CREBL2, DOCK7, ETV6, FAM60A, GPR183, HABP4, IER5, IL10RA, KCNH2, KLF6, MID2, NCOA7, NEDD4L, NR1D2, NR3C2, PARP3, PDCD6IP, PEA15, RASGRF1, RIPK2, SPTA1, TEAD2, UHMK1, WNT16
3	GO:0048583	regulation of response to stimulus	3600	10.3519	16	1.8853	0.0366936	AKAP6, ARHGAP20, BCL2, CAMK2N1, CDK4, CNR1, CTSH, ESR2, HLA-DPA1, IGF1R, NETO1, NFKBIA, PHB, SLC25A6, SLC9B2, STARD10
4	GO:0048856	anatomical structure development	4713	19.0379	26	1.65745	0.0380084	ANK3, BHLHE41, BMPR1A, C11orf63, CD27, CD80, COCH, COL4A3, COL4A4, CRIP1, ERRFI1, FCGR2B, IL2RA, KDM2B, LRRN1, MLLT4, NEO1, PLAG1, POF1B, RPS6KA6, SGPP1, ST14, TCF7, TLE3, WDR11, WEE1
2	GO:0048869	cellular developmental process	3408	23.7995	32	1.50684	0.0383779	ACKR3, ADRB2, AKT3, ANXA7, ARF6, ARHGAP24, BACE2, BMPR2, C16orf45, CD24, CDC42SE2, CEBPG, CREBL2, DOCK7, ETV6, FAM213A, FAM60A, GPR183, JAM3, KLF6, NEDD4L, NR1D2, RASGRF1, RILPL2, RIPK2, RSL1D1, SPATA6, SPTA1, TEAD2, TERF2, UHMK1, WNT16
4	GO:0048869	cellular developmental process	3408	13.7664	20	1.68907	0.0425095	ABCA5, ANK3, BHLHE41, BMPR1A, CD27, CD80, COCH, ERRFI1, FCGR2B, GLRX2, IL2RA, MLLT4, NEK6, NEO1, PLAG1, POF1B, SGPP1, ST14, TCF7, WEE1
6	GO:0009628	response to abiotic stimulus	1028	0.35191	2	8.82066	0.0428967	PDLIM1, PTPRK
3	GO:0048584	positive regulation of response to stimulus	1945	5.59291	10	2.03957	0.0454467	AKAP6, BCL2, CNR1, CTSH, HLA-DPA1, NETO1, NFKBIA, PHB, SLC25A6, STARD10
2	GO:0031325	positive regulation of cellular metabolic process	2577	17.9963	25	1.52058	0.0492371	AAED1, ACKR3, ADRB2, APOC1, ARL6IP5, BMPR2, CALM2, CD24, CEBPG, CREBL2, DOCK7, ETV6, GPR183, HABP4, IER5, KLF6, MID2, NCOA7, NR1D2, PARP3, PEA15, RIPK2, TEAD2, UHMK1, WNT16
Enrichment of Gene Ontology terms for each gene cluster and sorted by p-value
Footnotes:
1 Identifier for the Gene Ontology term of the biological process category
2 Only GO terms that contain up to 5,000 of the analyzed genes (size) and at least 20% of the genes of the respective cluster (count) were considered
3 Significance values were computed by hypergeometric testing with the GOstats R package (Falcon and Gentleman, Bioinformatics, 2007)
Abbreviations:
GO = Gene Ontology
ID = identifier
